# Supplementary material for: The MEK/ERK Pathway Promotes NOTCH Signalling in Pancreatic Cancer Cells
Source: PubMed Central journal article supplement (PMC3877363; doi:10.1371/journal.pone.0085502), 2013-12-31
Supplement: pone.0085502.s001.pdf [file pone.0085502.s001.pdf]

## SUPPLEMENTARY INFORMATION

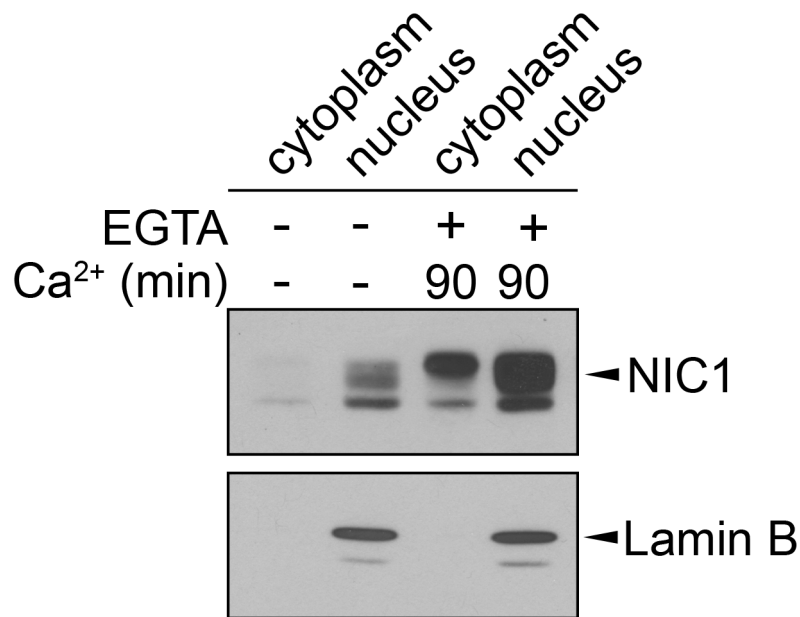

### FIGURE S1. Pulse of NOTCH1 activation leads to NIC1 nuclear localization.

MIA PaCa-2 cells were left untreated (-) or treated with EGTA (4mM) for 15min (+). EGTA-containing medium was removed and replaced by normal culture media (Ca<sup>2+</sup>) for 90min. Nuclear and cytoplasmic extracts were prepared and separated on SDS-PAGE. NIC1 expression levels in cytoplasmic and nuclear extracts were analysed by western blotting. As a control for nuclear protein, Lamin B expression levels were assessed.
